# Supplementary material for: Senolytic drugs relieve pain by reducing peripheral nociceptive signaling without modifying joint tissue damage in spontaneous osteoarthritis
Source: publisher site journal article supplement (doi:10.18632/aging.204204), 2022-08-10
Supplement: Supplementary file [file aging-v14i15-204204-supplementary-material-SD2.pdf]

## SUPPLEMENTARY TABLES

**Supplementary Table 1. Histomorphometric measurements of joint articular cartilage thickness and area.**

|                            | Veh            | ABT263         | p-value | Veh            | D+Q            | p-value |
|----------------------------|----------------|----------------|---------|----------------|----------------|---------|
|                            | Average ± SD   |                |         | Average ± SD   |                |         |
| <b>Cartilage</b>           |                |                |         |                |                |         |
| Thickness (µm)             | 71.87 ± 5.03   | 71.39 ± 9.00   | n.s     | 78.22 ± 8.55   | 73.74 ± 15.57  | n.s     |
| Area (mm <sup>2</sup> )    | 151.24 ± 27.94 | 131.04 ± 22.60 | n.s     | 149.09 ± 9.91  | 124.56 ± 40.08 | n.s     |
| <b>Calcified Cartilage</b> |                |                |         |                |                |         |
| Thickness (µm)             | 47.40 ± 5.34   | 43.21 ± 5.29   | n.s     | 41.98 ± 5.73   | 49.59 ± 10.29  | n.s     |
| Area (mm <sup>2</sup> )    | 62.26 ± 19.60  | 58.03 ± 7.96   | n.s     | 65.85 ± 10.87  | 67.22 ± 25.51  | n.s     |
| <b>Subchondral bone</b>    |                |                |         |                |                |         |
| Thickness (µm)             | 59.95 ± 13.98  | 51.95 ± 11.97  | n.s     | 64.39 ± 22.74  | 65.01 ± 26.75  | n.s     |
| Area (mm <sup>2</sup> )    | 74.72 ± 18.62  | 70.47 ± 18.26  | n.s     | 100.14 ± 49.09 | 88.52 ± 40.05  | n.s     |

\*SD, standard deviation.

\*n.s, not significant.

**Supplementary Table 2. Primer sequences of qRT-PCR.**

| <b>Gene symbol</b>                      | <b>Primer sequence (5'-3')</b>                                          |
|-----------------------------------------|-------------------------------------------------------------------------|
| <i>Ngf</i> (mouse)                      | Forward, ACTGGACTAAACTTCAGCATTCC<br>Reverse, GGGCAGCTATTGGTGCAGTA       |
| <i>Cdkn2a</i> (mouse)                   | Forward, AATCTCCGCGAGGAAAGC<br>Reverse, GTCTGCAGCGGACTCCAT              |
| <i>IL-1<math>\beta</math></i> (mouse)   | Forward, GTATGGGCTGGACTGTTTC<br>Reverse, GCTGTCTGCTCATTACG              |
| <i>Atf4</i> (mouse)                     | Forward, ATGGCGCTCTTCACGAAATC<br>Reverse, ACTGGTCGAAGGGGTCATCAA         |
| <i>Vegf</i> (mouse)                     | Forward, CTGCCGTCCGATTGAGACC<br>Reverse, CCCCTCCTTGTACCACTGTC           |
| <i>IL-6</i> (mouse)                     | Forward, GCTACCAAACCTGGATATAATCAGG<br>Reverse, CCAGGTAGCTATGGTACTCCAGAA |
| <i><math>\beta</math>-actin</i> (mouse) | Forward, CAACCGTGAAAAGATGACCC<br>Reverse, GTAGATGGGCACAGTGTGGG          |
| <i>NGF</i> (human)                      | Forward, GGCAGACCCGCAACATTACT<br>Reverse, CACCACCGACCTCGAAGTC           |
| <i>CDKN2A</i> (human)                   | Forward, CCAACGCACCGAATAGTTACG<br>Reverse, GCGCTGCCCATCATCATG           |
| <i>CDKN1A</i> (human)                   | Forward, TGTCCGTCAGAACCCATGC<br>Reverse, AAAGTCGAAGTTCATCGCTC           |
| <i>ATF4</i> (human)                     | Forward, CCCTTCACCTTCTTACAACCTC<br>Reverse, TGCCCAGCTCTAAACTAAAGGA      |
| <i>VEGF</i> (human)                     | Forward, ATGACCGAAATGAGCTTCCTG<br>Reverse, GCTGGAGAACCCATGAGGT          |
| <i>IL-6</i> (human)                     | Forward, CCCCTGACCCAACCACAAAT<br>Reverse, ATTTGCCGAAGAGCCCTCAG          |
| <i><math>\beta</math>-ACTIN</i> (human) | Forward, GTCCTCCTGAG<br>Reverse, GTAGATGGGCACAGTGTGGG                   |
